# Supplementary material for: Conditional blastocyst complementation of a defective Foxa2 lineage efficiently promotes the generation of the whole lung
Source: eLife. 2023 Oct 20;12:e86105. doi: 10.7554/eLife.86105 (PMC10642968; doi:10.7554/eLife.86105)
Supplement: Figure 1—source data 1. [file elife-86105-fig1-data1.xlsx]

## Sheet: Fig1-source1
Figure1C Quantification of PdgfrαCreERT2/+; Rosa26tdTomato/+ lineage labeling by IF morohometric analysis.
	Sample1				Sample2				Sample3
	field1	field2	field3	average	field1	field2	field3	average	field1	field2	field3	average	average of 3	SD
Nkx2-1	0	0	0	0	34	18.9655	26.087	26.3508	24.1611	31.7073	49.4949	35.1211	20.4906	18.2792
Sma	62.5	53.0612	66.6667	60.7426	100	100	100	100	100	100	100	100	86.9142	22.6653
Pdgfra	37.6	31.8182	38.7324	36.0502	100	100	100	100	100	100	100	100	78.6834	36.9214
Vecad	59.0361	42	40.9836	47.3399	100	100	100	100	100	100	100	100	82.4466	30.4033
