# Supplementary material for: Conditional blastocyst complementation of a defective Foxa2 lineage efficiently promotes the generation of the whole lung
Source: eLife. 2023 Oct 20;12:e86105. doi: 10.7554/eLife.86105 (PMC10642968; doi:10.7554/eLife.86105)
Supplement: Figure 1—source data 2. [file elife-86105-fig1-data2.xlsx]

## Sheet: Fig1-source2
Figure1G Quantification of Foxa2-lineage labeling in PS by IF morohometric analysis.
	dapi	Pdgfra+		tdTomato+		Pdgfra+tdTomato+
Sample1	59	50	84.7458	17	28.8136	8	16
Sample2	74	62	83.7838	20	27.027	7	11.2903
Sample3	30	28	93.3333	8	26.6667	8	28.5714
average			87.2876		27.5024		18.6206
SD			5.25778		1.14969		8.93363
