# Supplementary material for: Conditional blastocyst complementation of a defective Foxa2 lineage efficiently promotes the generation of the whole lung
Source: eLife. 2023 Oct 20;12:e86105. doi: 10.7554/eLife.86105 (PMC10642968; doi:10.7554/eLife.86105)
Supplement: Figure 2—figure supplement 1—source data 1. [file elife-86105-fig2-figsupp1-data1.xlsx]

## Sheet:  Figure 1- figure supplement 1E
Figure2-figure supplement1E Foxa2 qPCR for tdTomato+ (tdT+) or tdTomato- (tdT-) CD45- CD31- EPCAM- mesenchymal cells and CD45-CD31-EpCAM+ epithelial cells
	Mesenchymal cell tdT+	Mesenchymal cell tdT-	Epithelial cell
	0.573655	0.502765	19.4857
	2.67924	1.17144	43.0156
	2.16491	1.32579	30.0568
