# Supplementary material for: Conditional blastocyst complementation of a defective Foxa2 lineage efficiently promotes the generation of the whole lung
Source: eLife. 2023 Oct 20;12:e86105. doi: 10.7554/eLife.86105 (PMC10642968; doi:10.7554/eLife.86105)
Supplement: Figure 2—figure supplement 1—source data 2. [file elife-86105-fig2-figsupp1-data2.xlsx]

## Sheet:  Fig2-sup1-source2
Figure2-figure supplement1F Flow cytometry quantitative analyses: EdU labeling cells in CD31+Epcam- endothelium at E14.5 and E18.5 of Foxa2Cre/+; RosatdTomato/+ lungs.
	E14.5 tdTomato +	E14.5 tdTomato -	E18.5 tdTomato +	E18.5 tdTomato -
	59.1	53.6	29.8	28.5
	45.1	45.7	27	26.8
	51	50.9	31.6	29
	52.6	53.2	33	30.1
	49.6	53.6	28	28.1
	41.9	23.5	31.4	29.8
average	49.8833	46.75	30.1333	28.7167
SD	6.00447	11.7842	2.30014	1.20568
	Paired t test		Paired t test
	P value	0.3859	P value	0.036
