# Supplementary material for: Conditional blastocyst complementation of a defective Foxa2 lineage efficiently promotes the generation of the whole lung
Source: eLife. 2023 Oct 20;12:e86105. doi: 10.7554/eLife.86105 (PMC10642968; doi:10.7554/eLife.86105)
Supplement: Figure 2—source data 1. [file elife-86105-fig2-data1.xlsx]

## Sheet: Fig2-source1
Figure2E FCM quantitative analyses for CD31-Epcam+ lung epithelium, CD31-Epcam- mesenchyme, and CD31+Epcam- endothelium at E14.5, E18.5, P0, and four weeks adult
	Epithelium					Mesenchyme					Endothelium
	E14.5	E18.5	P0	4 Weeks		E14.5	E18.5	P0	4 Weeks		E14.5	E18.5	P0	4 Weeks
	92.4	97.5	99.7	100		21.1	38.5	49.6	49.7		13.4	47.8	60.2	65.9
	95.3	97.8	99.2	99.9		32.4	40	37.8	53.1		24.3	52.5	51.3	63.7
	90.9	97.7	99.1	100		21.2	45.2	38.9	51		15.5	53.8	41.6	50.3
	94.5	97	99.6			21.9	39.4	38.8			13.8	47.5	49.3
		97.2	99.1				43.3	37.6				45.9	43.8
		97	99.4				43.9	39.5				52	59.1
			99.2					28.2					31.7
average	93.275	97.3667	99.3286	99.9667	average	24.15	41.7167	38.6286	51.2667	average	16.75	49.9167	48.1429	59.9667
SD	2.00062	0.350238	0.242997	0.057735	SD	5.5115	2.75929	6.21469	1.71561	SD	5.11501	3.24186	10.0729	8.44354
Mesenchyme
Tukey's multiple comparisons test	Mean Diff.	95.00% CI of diff.	Below threshold?	Summary	Adjusted P Value
E14.5 vs. E18.5	-17.57	-26.41 to -8.724	Yes	***	0.0002
E14.5 vs. P0	-14.48	-23.06 to -5.892	Yes	***	0.001
E14.5 vs. 4W	-27.12	-37.58 to -16.65	Yes	****	<0.0001
E18.5 vs. P0	3.088	-4.533 to 10.71	No	ns	0.6598
E18.5 vs. 4W	-9.55	-19.24 to 0.1366	No	ns	0.054
P0 vs. 4W	-12.64	-22.09 to -3.185	Yes	**	0.0073
Endhothelium
Tukey's multiple comparisons test	Mean Diff.	95.00% CI of diff.	Below threshold?	Summary	Adjusted P Value
E14.5 vs. E18.5	-33.17	-46.88 to -19.45	Yes	****	<0.0001
E14.5 vs. P0	-31.39	-44.71 to -18.08	Yes	****	<0.0001
E14.5 vs. 4W	-43.22	-59.44 to -26.99	Yes	****	<0.0001
E18.5 vs. P0	1.774	-10.05 to 13.59	No	ns	0.9726
E18.5 vs. 4W	-10.05	-25.07 to 4.974	No	ns	0.2613
P0 vs. 4W	-11.82	-26.49 to 2.838	No	ns	0.1378
