# Supplementary material for: Conditional blastocyst complementation of a defective Foxa2 lineage efficiently promotes the generation of the whole lung
Source: eLife. 2023 Oct 20;12:e86105. doi: 10.7554/eLife.86105 (PMC10642968; doi:10.7554/eLife.86105)
Supplement: Figure 2—source data 2. [file elife-86105-fig2-data2.xlsx]

## Sheet: Fig2-source2
Figure2G The morphometric analysis: % of E14.5 Foxa2-lineage labeling with each lung marker
	Nkx2-1	Pdgfrβ	Sma	VE-cadherin	Pecam1	WT1
Sample1	100	35.1341	43.3824	47.3193	46.9136	60
Sample2	100	35.519	29.8701	53.9454	53.3333	61.5385
Sample3	100	43.534	37	55.8249	49.2958	23.5294
Sample4	100	25.3844	28.5714	51.4296	40.9091	77.7778
Sample5	100	45.9884	45.2381	33.6539	46.0317	31.5789
Sample6	100	53.1696	37	48.9026	43.1373	60
Sample7	100	46.3068	44.4444	39.444	43.9024	14.8148
Sample8	100	45.916	26.4151	21.3429	33.3333	51.2195
Sample9	100	38.8015	28.2609	27.8322	30.7692	16.6667
Sample10	100	32.4791	41.5929	30.2052	31.7073	10
Sample11	100	27.0232	31.9018	20.1202	26.9663	22.2222
Sample12	100	43.2341	25	31.6765	21.1538	0
Sample13	100	31.6494	21.5827	31.4515	18.1818	15.3846
Sample14	100	62.642	21.1382	38.7945	32.8125	19.3548
Sample15	100	53.7284	16.6667	57.9032	34.2857	14.2857
average	100	41.3673	31.871	39.3231	36.8489	31.8915
SD	0	10.4663	9.15551	12.5177	10.3825	23.6961
