# Supplementary material for: Conditional blastocyst complementation of a defective Foxa2 lineage efficiently promotes the generation of the whole lung
Source: eLife. 2023 Oct 20;12:e86105. doi: 10.7554/eLife.86105 (PMC10642968; doi:10.7554/eLife.86105)
Supplement: Figure 3—figure supplement 1—source data 1. [file elife-86105-fig3-figsupp1-data1.xlsx]

## Sheet: Fig3-sup1-source1
Figure3-figure supplement1C % GFP in CD31+Epcam- lung endothelium analyzed by flow cytometry.
		Day6	Day8	Day10	Day12	Day15
	Bud structure area
	Sample 1	2.1725	13.8675	27.973	52.6708	56.6161
	Sample 2	2.48365	20.414	27.0628	43.3796	66.7946
	Sample 3	3.85656	30.7236	33.8053	39.4581	48.6469
	average	2.83757	21.6684	29.6137	45.1695	57.3525
	SD	0.896077	8.49776	3.65845	6.78578	9.09622
	NKX2-1+ cells in bud structure
		38.37	46.64	75.21	91.58	92.07
		51.16	82.86	77.48	93.33	100
		43.94	68.55	93.77	97.25	95.5
	average	44.49	66.0167	82.1533	94.0533	95.8567
	SD	6.41271	18.2424	10.1242	2.90338	3.97701
	SOX9+ cells in NKX2-1+ cells
		0	12.8	58.24	95.68	96.2
		0	34.48	45.32	97.32	100
		0	36.47	41.53	96.05	99.06
	average	0	27.9167	48.3633	96.35	98.42
	SD	0	13.1292	8.76085	0.860174	1.97919
	SOX9+ cells in bud structure
		0	5.97015	43.8017	87.6238	88.5781
		0	28.5714	35.1145	90.8333	100
		0	25	38.9408	93.4066	94.5946
	average	0	19.8472	39.2857	90.6212	94.3909
	SD	0	12.1498	4.35383	2.89724	5.71368
	NKX2-1+ cells in SOX9+ cells
		0	75	98.1132	100	100
		0	90	100	100	100
		0	91.9355	96	100	100
	average	0	85.6452	98.0377	100	100
	SD	0	9.26963	2.00107	0	0
