# Supplementary material for: Conditional blastocyst complementation of a defective Foxa2 lineage efficiently promotes the generation of the whole lung
Source: eLife. 2023 Oct 20;12:e86105. doi: 10.7554/eLife.86105 (PMC10642968; doi:10.7554/eLife.86105)
Supplement: Figure 3—figure supplement 1—source data 2. [file elife-86105-fig3-figsupp1-data2.xlsx]

## Sheet:  Fig3-sup1-source2
Figure3-figure supplement1D % GFP in CD45+ hematopoietic cells analyzed by flow cytometry.
	TBX4+ cells in non-bud cells
	Day6	Day8	Day10	Day12	Day15
	0	2.42915	36.7769	43.0233	44.9198
	0	13.3971	34.2723	41.358	45.2632
	0	17.9487	37.5635	43.4555	50
	0	7.56302	35.6808	39.5062	48.2412
	0	9.5	29.0749	28.877	52.3809
average	0	10.1676	34.6737	39.244	48.161
SD	0	5.87556	3.36511	6.00066	3.1662
