# Supplementary material for: Conditional blastocyst complementation of a defective Foxa2 lineage efficiently promotes the generation of the whole lung
Source: eLife. 2023 Oct 20;12:e86105. doi: 10.7554/eLife.86105 (PMC10642968; doi:10.7554/eLife.86105)
Supplement: Figure 3—source data 1. [file elife-86105-fig3-data1.xlsx]

## Sheet: Fig3-source1
Figure3D qRT-PCR analyses of lung mesenchyme and epithelium markers in time course of directed differentiation
	Day0	Day3	Day6	Day8	Day10	Day12	Day14
NKX2-1	1.20409	ND	3.32427	3.30302	7.11336	9.08578	6.93457
	0.0120383	0.145607	0.0718972	1.37556	9.69452	12.1996	10.8817
	1.78387	ND	0.00197775	1.96152	3.86324	5.0806	19.0288
average	1	0.145607	1.13272	2.21337	6.89037	8.78867	12.2817
TBX4	1.13666	ND	31.9551	46.3918	67.2851	70.9018	92.8082
	0.248315	0.482915	0.0781463	2.60256	38.1801	117.318	140.171
	1.61502	ND	0.0941342	5.41819	23.5444	97.8883	137.524
average	1	0.482915	10.7091	18.1375	43.0032	95.3694	123.501
WNT2	1.45409	ND	1.34843	1.60538	4.37884	11.7986	5.10414
	0.631169	0.711767	0.016768	0.0242578	3.46665	9.77076	5.29721
	0.914738	0.0242134	0.437893	0.198134	3.74284	3.75277	1.27149
average	1	0.36799	0.601031	0.609259	3.86278	8.4407	3.89095
OSR1	2.08561	0.251794	328.636	275.292	607.158	696.081	539.633
	0.0801897	2.34196	ND	86.6685	559.036	441.072	539.639
	0.834202	2.75818	0.753176	91.7027	578.074	695.446	565.678
average	1	1.78398	164.695	151.221	581.423	610.866	548.317
FGF10	1.09023	ND	29.3333	26.4079	9.18231	15.9249	2.55232
	0.417974	4.53973	11.4856	4.7399	10.0648	14.3625	4.06831
	1.4918	ND	7.89895	16.7483	32.7794	15.1091	1.87955
average	1	4.53973	16.2393	15.9654	17.3422	15.1322	2.8334
BMP4	2.03491	2.60464	19.0965	19.6064	8.81789	4.60609	1.55694
	0.24009	1.90823	0.280031	2.38863	9.06895	5.27422	2.73799
	0.724998	1.39988	2.0246	8.42106	5.70469	3.07266	2.0601
average	1	1.97092	7.13372	10.1387	7.86384	4.31766	2.11834
PDGFRa	1.04861	ND	59.6737	60.4065	32.4467	85.8388	32.8981
	0.591405	14.6436	0.987559	10.6904	133.359	117.38	76.295
	1.35999	ND	0.500744	44.3466	186.989	165.292	53.6035
average	1	14.6436	20.3873	38.4812	117.598	122.837	54.2655
ACTA2	1.60177	0.0525351	29.6767	30.6649	15.4618	4.95673	2.33398
	0.353738	0.0513021	0.0329344	1.10462	11.8154	6.13032	4.88438
	1.04449	0.0390972	0.250886	12.4398	9.40833	3.63966	2.06466
average	1	0.0476448	9.98684	14.7364	12.2285	4.90891	3.09434
PDGFRb	1.00138	0.00877495	5.88822	6.2422	3.82301	3.74339	3.8905
	0.321498	1.66991	0.0371769	0.435048	3.24912	3.02786	1.91437
	1.67712	ND	0.40409	2.55775	3.9119	2.1263	1.83285
average	1	0.83934	2.10983	3.07833	3.66134	2.96585	2.5459
ISL1	1.09203	ND	65.2589	85.8299	64.8331	88.1978	40.5775
	0.0545536	2.44489	3.61679	2.70778	32.8704	25.7334	30.5788
	1.85338	0.618152	9.56591	15.8463	44.806	33.9779	32.2613
average	1	1.53152	26.1472	34.7947	47.5032	49.3031	34.4725
FOXF1	2.33539	ND	107.768	68.3377	347.509	3538.63	1546.66
	0.272826	0.353431	2.50134	47.0322	537.312	1591.9	393.236
	0.391788	3.21788	0.197537	36.524	3564.02	8709.29	1291.06
average	1	1.78565	36.8222	50.6313	1482.95	4613.27	1076.98
CPM	1.80125	0.000756958	526.146	510.848	707.687	935.92	480.95
	0.697552	0.810482	0.0235898	13.2165	634.676	814.444	917.962
	0.501197	0.103918	0.126215	136.775	507.782	450.516	374.152
average	1	0.305052	175.432	220.28	616.715	733.627	591.022
