# Supplementary material for: Conditional blastocyst complementation of a defective Foxa2 lineage efficiently promotes the generation of the whole lung
Source: eLife. 2023 Oct 20;12:e86105. doi: 10.7554/eLife.86105 (PMC10642968; doi:10.7554/eLife.86105)
Supplement: Figure 3—source data 2. [file elife-86105-fig3-data2.xlsx]

## Sheet: Fig3-source2
Figure3H qRT-PCR analyses of mesendoderm markers in time course of directed differentiation
	0h	12h	24h	36h	48h	60h	72h
FOXA2	0.312187	2.07451	2.97588	5.74117	12.3321	9.02497	15.6609
	1.5045	2.68654	3.05422	2.02658	23.8622	14.9254	29.4659
	1.18331	0.97524	1.88985	1.19724	16.4525	16.2707	20.0383
average	1	1.9121	2.63999	2.98833	17.5489	13.407	21.7217
PDGFRa	1.48625	0.450128	403.968	575.065	229.259	99.0401	74.5581
	0.882659	1.0663	468.197	482.58	194.082	91.2541	70.6559
	0.631092	0.721697	382.294	628.32	204.459	73.6866	57.4329
average	1	0.746041	418.153	561.988	209.267	87.9936	67.549
MIXL1	0.960317	605.979	2640.47	2156.23	825.989	969.183	679.746
	1.08711	795.716	3055.49	1751.79	794.86	640.502	778.91
	0.952573	827.313	2863.93	1829.31	842.858	588.101	1339.83
average	1	743.003	2853.3	1912.44	821.236	732.595	932.829
