# Supplementary material for: Conditional blastocyst complementation of a defective Foxa2 lineage efficiently promotes the generation of the whole lung
Source: eLife. 2023 Oct 20;12:e86105. doi: 10.7554/eLife.86105 (PMC10642968; doi:10.7554/eLife.86105)
Supplement: Figure 4—figure supplement 2—source data 1. [file elife-86105-fig4-figsupp2-data1.xlsx]

## Sheet:  Fig4-sup2-source1
Figure4-figure supplement2C Morphometric IF analysis of chimeric thymus: % chimerism of thymus epithelium and mesenchyme.
	Epithelium			Mesenchyme
	Foxa2Cre/+; Fgfr2cKO	Foxa2Cre/+; Fgfr2hetero	ShhCre/+; Fgfr2cKO	Foxa2Cre/+; Fgfr2cKO	Foxa2Cre/+; Fgfr2hetero	ShhCre/+; Fgfr2cKO
	97.7	67.9	22.5	60.25	55.1667	37.75
	89.5	74.5	5.1	76	59.1667	16.25
	85.3	13.4	65.7	62	26.5	51.75
	92.8		42.3	41.5		27
	96.5		7.8	24.5		34.25
average	92.36	51.9333	28.68	52.85	46.9444	33.4
SD	5.09588	33.5336	25.4272	20.0434	17.818	13.1477
	ANOVA summary			ANOVA summary
	F	10.44		F	1.669
	P value	0.0036		P value	0.2368
	Unpaired t test
	P value	0.0314	0.0006
