# Supplementary material for: Conditional blastocyst complementation of a defective Foxa2 lineage efficiently promotes the generation of the whole lung
Source: eLife. 2023 Oct 20;12:e86105. doi: 10.7554/eLife.86105 (PMC10642968; doi:10.7554/eLife.86105)
Supplement: Figure 4—figure supplement 4—source data 1. [file elife-86105-fig4-figsupp4-data1.xlsx]

## Sheet:  Fig4-sup4-source1
Figure4-figure supplement4 Morphometric analysis of E17.5 chimeric lungs in each lung mesenchyme markers
	Artery		Vein		Capillary		Pericyte		Mesotheium
	Foxa2Cre/+; Fgfr2cKO	ShhCre/+; Fgfr2cKO	Foxa2Cre/+; Fgfr2cKO	ShhCre/+; Fgfr2cKO	Foxa2Cre/+; Fgfr2cKO	ShhCre/+; Fgfr2cKO	Foxa2Cre/+; Fgfr2cKO	ShhCre/+; Fgfr2cKO	Foxa2Cre/+; Fgfr2cKO	ShhCre/+; Fgfr2cKO
	65.6498	49.1481	54.9693	19.7568	85.5535	49.9756	84.6622	40.7603	58.9744	22.2222
	83.8515	72.8885	71.6908	49.7812	94.4218	86.8463	85.6217	54.3061	70.3704	36
	85.6565	63.8624	76.9985	54.7706	91.1833	60.2908	90.7633	62.9576	89.7959	29.4118
	71.0996	78.6349	45.0877	65.7192	90.9691	68.5508	85.2942	68.3308	53.4884	33.3333
	55.1359	42.0002	53.5202	37.0996	75.3331	47.7002	56.744	61.159	33.3333	57.9545
average	72.2787	61.3068	60.4533	45.4255	87.4921	62.6727	80.6171	57.5028	61.1925	35.7844
SD	12.7681	15.5041	13.3629	17.6518	7.50559	15.8901	13.5661	10.6172	20.8734	13.4361
	Unpaired t test		Unpaired t test		Unpaired t test		Unpaired t test		Unpaired t test
	P value	0.2567	P value	0.1675	P value	0.0134	P value	0.0171	P value	0.0514
