# Supplementary material for: Conditional blastocyst complementation of a defective Foxa2 lineage efficiently promotes the generation of the whole lung
Source: eLife. 2023 Oct 20;12:e86105. doi: 10.7554/eLife.86105 (PMC10642968; doi:10.7554/eLife.86105)
Supplement: Figure 4—figure supplement 5—source data 1. [file elife-86105-fig4-figsupp5-data1.xlsx]

## Sheet:  Fig4-sup5-source1
Figure4-figure supplement5E Morphometric IF analysis of the chimeric trachea: % chimerism of tracheal epithelium and mesenchyme
	Epithelium			Mesenchyme
	Foxa2Cre/+; Fgfr2cKO	Foxa2Cre/+; Fgfr2hetero	ShhCre/+; Fgfr2cKO	Foxa2Cre/+; Fgfr2cKO	Foxa2Cre/+; Fgfr2hetero	ShhCre/+; Fgfr2cKO
	98.9	55.676	92.5	74	67.8333	57.5
	99.2	61.6602	41.6	40.5	59.3333	53.3
	100	57.6135	68.3	36.7	49.1667	46.8
	87		77.1	33.3		48.5
	91.9		74.6	20.3		41.7
average	95.4		70.82	40.96		49.56
SD	5.71533		18.6005	19.9719		6.07355
	ANOVA summary			ANOVA summary
	F	9.545		F	1.581
	P value	0.0048		P value	0.2532
Tukey's multiple comparisons test	Mean Diff.	95.00% CI of diff.	Below threshold?	Summary	Adjusted P Value
Foxa2 vs. Shh	24.58	3.111 to 46.05	Yes	*	0.026
Foxa2 vs. Foxa2 hetero	37.07	12.28 to 61.86	Yes	**	0.0055
Shh vs. Foxa2 hetero	12.49	-12.30 to 37.28	No	ns	0.3865
