# Supplementary material for: Conditional blastocyst complementation of a defective Foxa2 lineage efficiently promotes the generation of the whole lung
Source: eLife. 2023 Oct 20;12:e86105. doi: 10.7554/eLife.86105 (PMC10642968; doi:10.7554/eLife.86105)
Supplement: Figure 4—source data 1. [file elife-86105-fig4-data1.xlsx]

## Sheet: Fig4-source1
Figure4H Morphometric analysis: % GFP in Nkx2-1+ epithelial cells and Sma+ airway smooth muscle cells in Foxa2Cre; Fgfr2cnull; RosatdTomato and ShhCre; Fgfr2cnull; RosatdTomato.
	Nkx2-1		Sma
	Foxa2Cre/+; Fgfr2cKO	ShhCre/+; Fgfr2cKO	Foxa2Cre/+; Fgfr2cKO	ShhCre/+; Fgfr2cKO
	100	100	87.1766	24.3384
	100	100	86.393	59.5049
	100	100	92.7682	41.9638
	100	100	72.6406	65.8804
	100	100	63.6635	40.0298
average	100	100	80.5284	46.3435
SD	0	0	11.9901	16.5694
			Unpaired t test
			P value	0.0057
