# Supplementary material for: Conditional blastocyst complementation of a defective Foxa2 lineage efficiently promotes the generation of the whole lung
Source: eLife. 2023 Oct 20;12:e86105. doi: 10.7554/eLife.86105 (PMC10642968; doi:10.7554/eLife.86105)
Supplement: Figure 4—source data 2. [file elife-86105-fig4-data2.xlsx]

## Sheet: Fig4-source2
Figure4K Morphometric analysis: % Ki67 labeling in mesenchymal cells of E14.5 Foxa2Cre/+; Fgfr2cnull chimeric lungs
	Ki67+ in GFP+ cells	Ki67+ in tdT+ cells
	62.3656	58.5366
	58.5492	35
	71.0784	35.7143
	62.0321	50
	55.2239	50.5618
	68.1672	62.6168
average	62.9027	48.7382
SD	5.89103	11.4184
	Paired t test
	P value	0.0418
