# Supplementary material for: Conditional blastocyst complementation of a defective Foxa2 lineage efficiently promotes the generation of the whole lung
Source: eLife. 2023 Oct 20;12:e86105. doi: 10.7554/eLife.86105 (PMC10642968; doi:10.7554/eLife.86105)
Supplement: Figure 5—source data 1. [file elife-86105-fig5-data1.xlsx]

## Sheet: Fig5-source1
Figure5B Respiratory function analysis of f (frequency), TV (tidal volume), Raw (airway resistance), and EF50 (expiratory flow at the point 50% of TV is expired) of Foxa2Cre/+; Fgfr2cnull; RosatdTomato
	f		TV		Raw		EF50
	Foxa2Cre/+; Fgfr2cKO	Foxa2Cre/+; Fgfr2hetero	Foxa2Cre/+; Fgfr2cKO	Foxa2Cre/+; Fgfr2hetero	Foxa2Cre/+; Fgfr2cKO	Foxa2Cre/+; Fgfr2hetero	Foxa2Cre/+; Fgfr2cKO	Foxa2Cre/+; Fgfr2hetero
	206.676	235.205	0.225422	0.231452	7.20864	3.18847	1.98146	2.38086
	257.747	239.584	0.162117	0.314579	3.77624	3.1436	1.9225	3.1085
	236.681	240.447	0.280004	0.329491	4.15963	2.95549	3.02291	3.68183
	227.029	303.115	0.280843	0.349627	3.13669	1.8777	2.57623	4.9471
	236.335	206.061	0.317742	0.213024	3.41749	3.71509	2.91582	2.10633
		224.469		0.239654		5.15603		2.38918
		263.119		0.201813		2.23272		2.30621
		259.314		0.178854		5.61349		1.88371
		210.008		0.121168		8.59559		1.12849
		231.84		0.172737		8.07331		1.74231
		232.96		0.238319		2.40777		2.14747
		259.46		0.134547		10.2541		1.50785
		221.926		0.277284		1.74772		2.74454
		230.071		0.256051		4.80299		2.32521
		249.772		0.197347		16.8186		1.77595
		187.37		0.207332		9.25888		1.5581
		210.213		0.29978		2.81205		2.81928
		230.602		0.227816		5.9367		2.21841
		252.7		0.230308		3.87616		2.36666
average	232.894	236.223	0.253225	0.232694	4.33974	5.39297	2.48379	2.37568
SD	18.4773	25.667	0.0606544	0.0617752	1.64912	3.79687	0.513134	0.860394
	Unpaired t test		Unpaired t test		Unpaired t test		Unpaired t test
	P value	0.7896	P value	0.514	P value	0.5561	P value	0.7927
