# Supplementary material for: Conditional blastocyst complementation of a defective Foxa2 lineage efficiently promotes the generation of the whole lung
Source: eLife. 2023 Oct 20;12:e86105. doi: 10.7554/eLife.86105 (PMC10642968; doi:10.7554/eLife.86105)
Supplement: Figure 5—source data 2. [file elife-86105-fig5-data2.xlsx]

## Sheet: Fig5-source2
Figure5F FCM analysis: temaining tdTomato+ cell population of each cell types in 4weeks Fgfr2cnull or Fgfr2hetero lungs injected with PSCCAG-GFP
	Epithelium		Mesenchyme		Endothelium
	Foxa2Cre/+; Fgfr2cKO	Foxa2Cre/+; Fgfr2hetero	Foxa2Cre/+; Fgfr2cKO	Foxa2Cre/+; Fgfr2hetero	Foxa2Cre/+; Fgfr2cKO	Foxa2Cre/+; Fgfr2hetero
	0	78.7	0.79	29.8	0.17	44.8
	0.36	41.2	4.79	25.2	12.1	57.8
	0.15	8.25	0.21	6.99	0.15	26.7
	0	47.3	0.5	46.2	3.68	64.6
	0.96	33	2.7	19.7	3.21	26.6
		28.3		27.6		43.9
		31.9		22.5		35
		45.2		27.1		38.2
		63.3		26.6		44.5
		47.5		26.3		51.6
		87.6		53.6		81.4
		95.1		20.6		21.8
		46.5		23.7		35.8
		17.7		17.7		25.6
		61.7		41		61.2
		52.8		38.8		56.7
		47.7		36.9		55.7
		7.09		11.3		21.7
		32.1		32.7		54.4
average	0.294	45.9442	1.798	28.1205	3.862	44.6316
SD	0.400475	24.092	1.93574	11.5204	4.89215	16.4645
	Unpaired t test		Unpaired t test		Unpaired t test
	P value	0.0004	P value	<0.0001	P value	<0.0001
