# Supplementary material for: Conditional blastocyst complementation of a defective Foxa2 lineage efficiently promotes the generation of the whole lung
Source: eLife journal article supplement (doi:10.7554/elife.86105), 2023-10-20

**A***Foxa2<sup>Cre</sup>; Fgfr2 cKO; Rosa26<sup>tdTomato</sup>*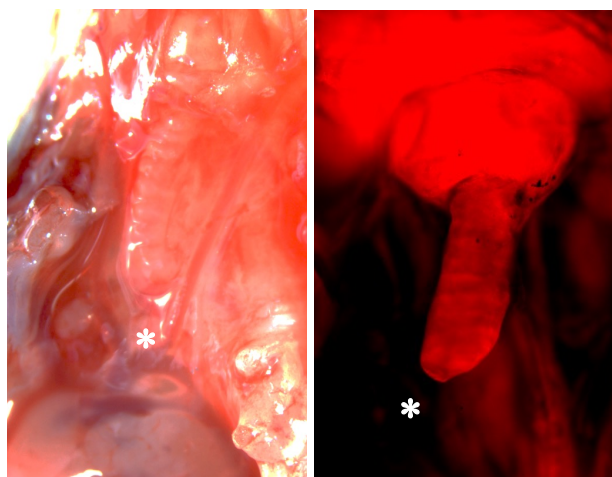**B***Shh<sup>Cre</sup>; Fgfr2 cKO; Rosa26<sup>tdTomato</sup>*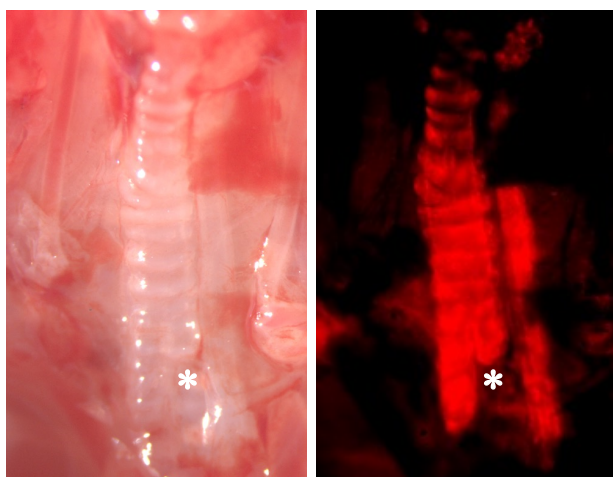**C***Foxa2<sup>Cre/+</sup>; Fgfr2 cKO + nGFP<sup>+</sup>iPSC*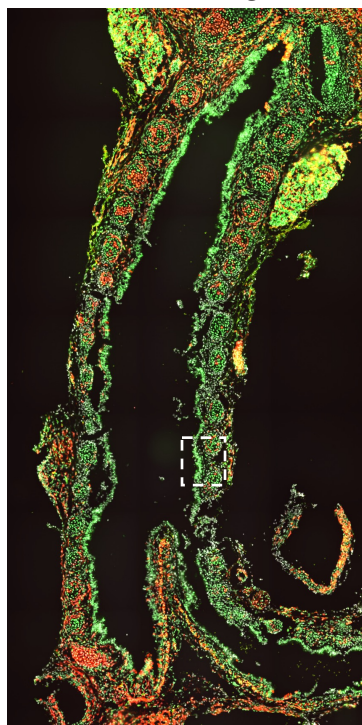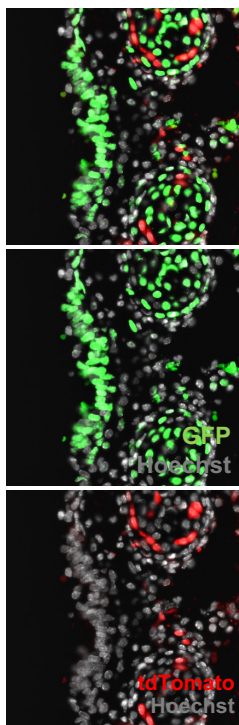**D***Shh<sup>Cre/+</sup>; Fgfr2 cKO + nGFP<sup>+</sup>iPSC*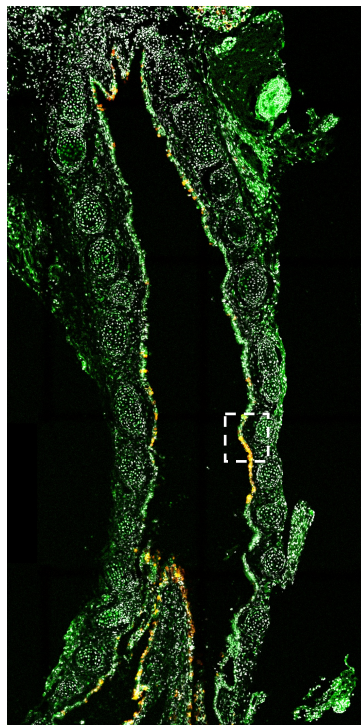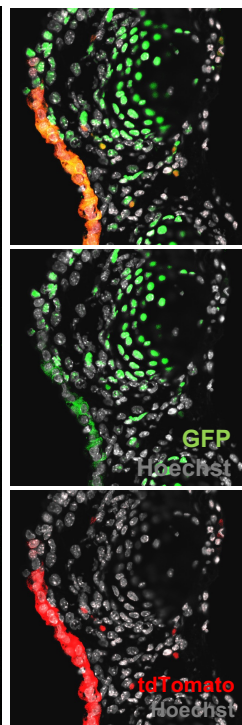

GFP tdTomato Hoechst

**E**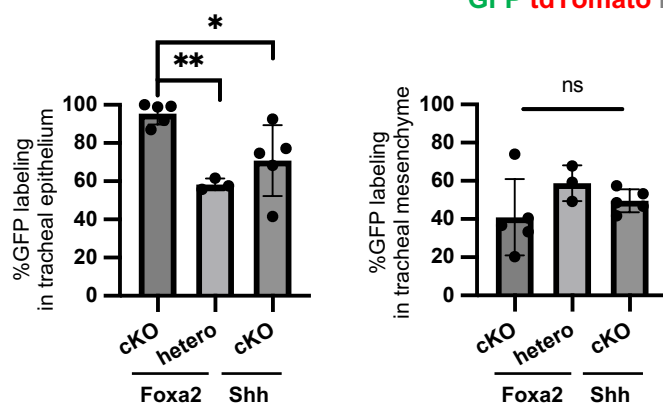

Supplement: supp [file elife-86105-supp-v1.zip]
