# Supplementary material for: Conditional blastocyst complementation of a defective Foxa2 lineage efficiently promotes the generation of the whole lung
Source: eLife journal article supplement (doi:10.7554/elife.86105), 2023-10-20
Supplement: supp [file elife-86105-supp-v1.zip]

**A***Fgfr2* hetero*Fgfr2* cKO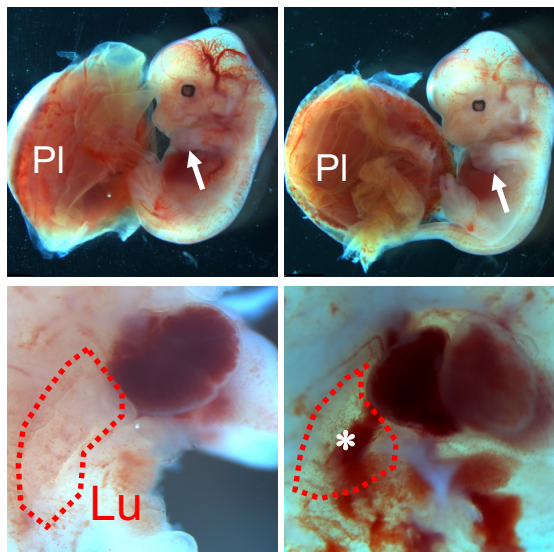**B***Fgfr2* hetero*Fgfr2* cKO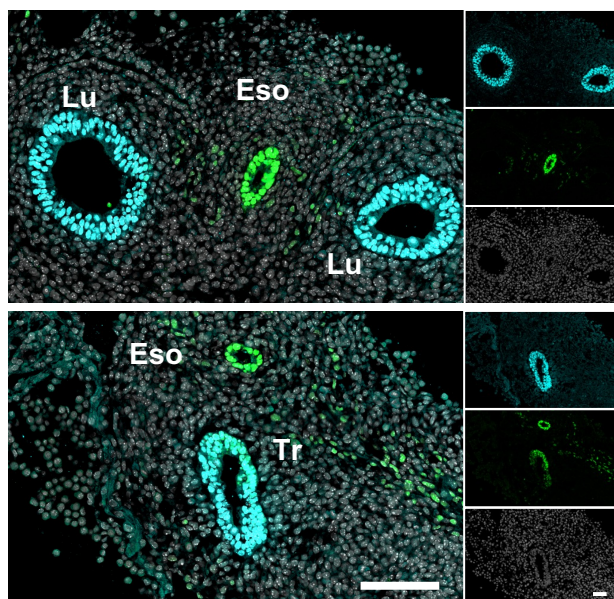

Sox2 Nkx2-1 Hoechst

**C**

Kidney

Glandular stomach

Pancreas

Hair follicles

Tooth bud

*Fgfr2* cKO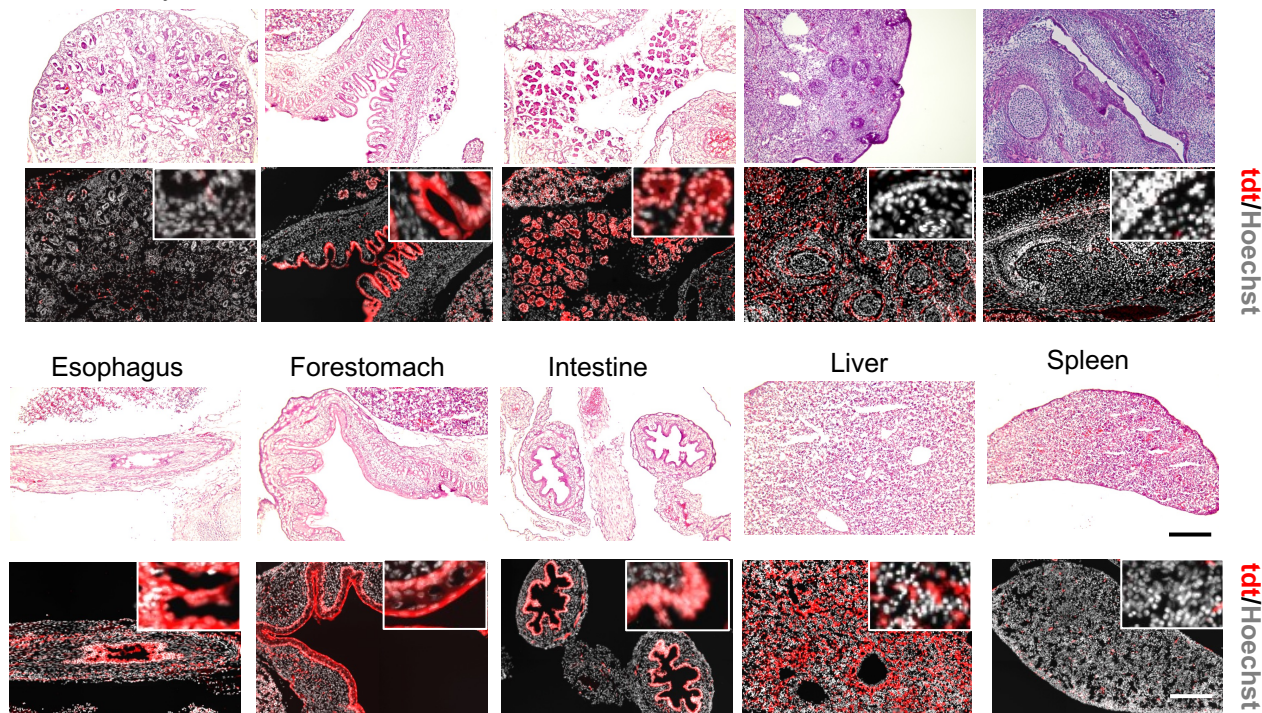

tdt/Hoechst

tdt/Hoechst
