# Supplementary material for: Conditional blastocyst complementation of a defective Foxa2 lineage efficiently promotes the generation of the whole lung
Source: eLife journal article supplement (doi:10.7554/elife.86105), 2023-10-20

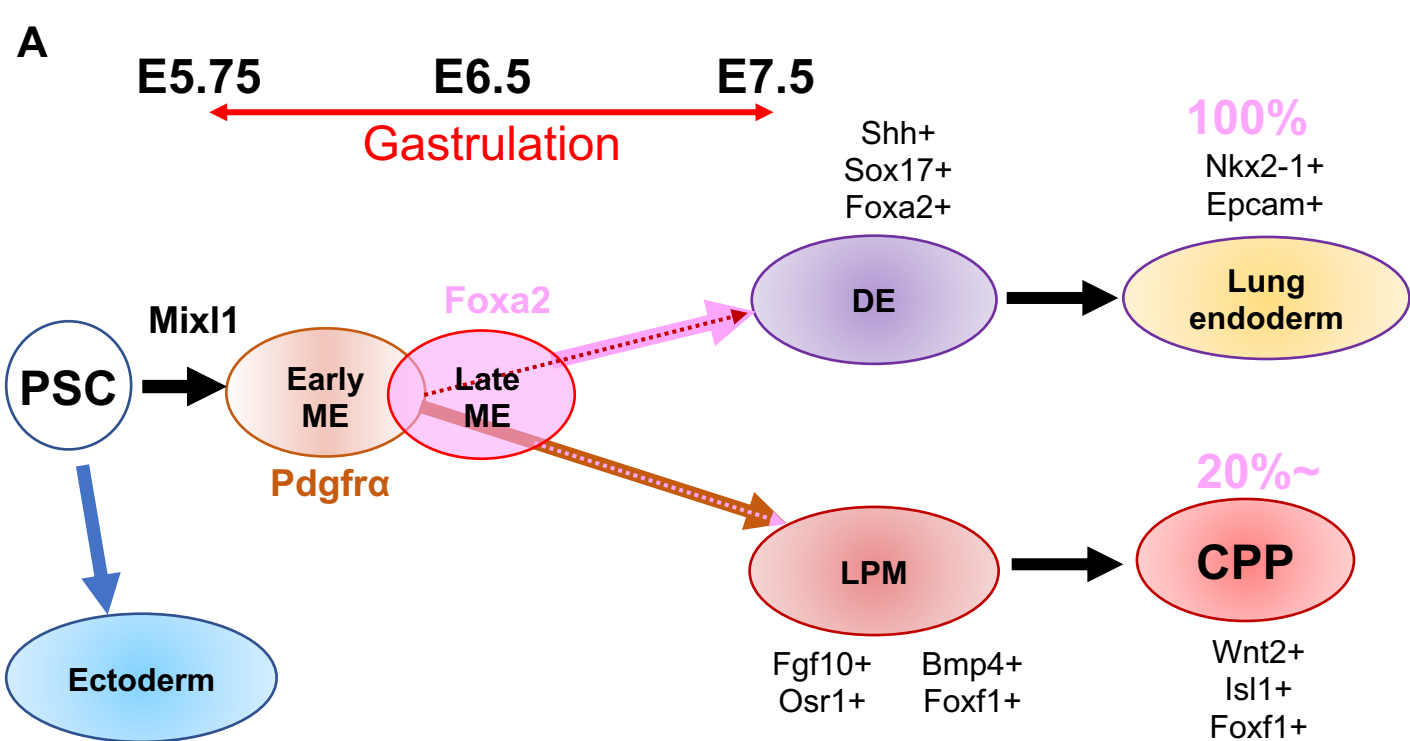

**ME\*:** mesendoderm (primitive streak ~ nascent mesoderm)

**Foxa2 lineage** ⇒ All lung epithelium & 20%~ of the lung mesenchyme

**Pdgra lineage** ⇒ All lung mesenchyme & 20% of the lung epithelium

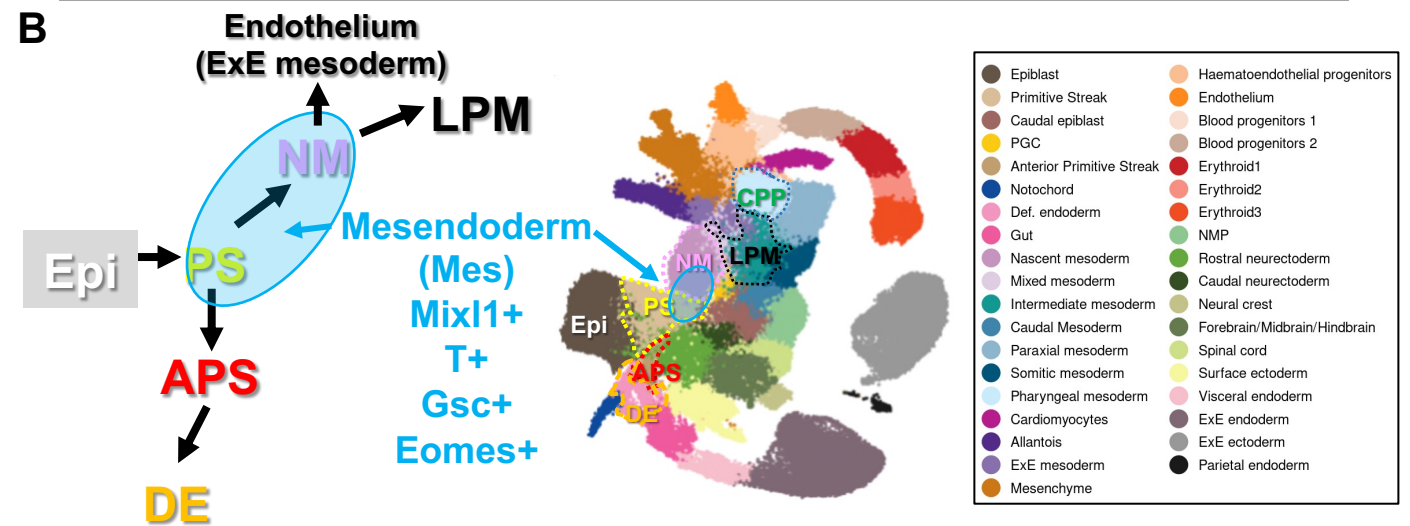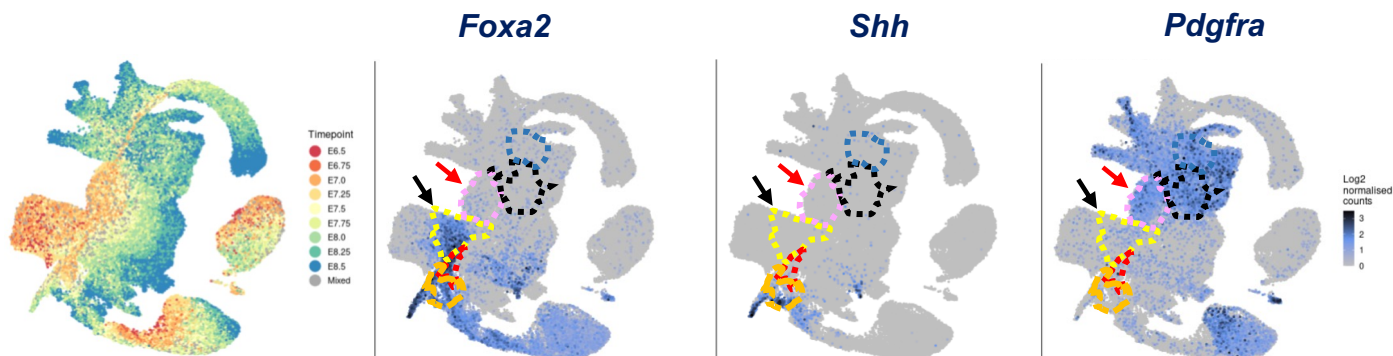

Supplement: supp [file elife-86105-supp-v1.zip]
