# Supplementary material for: Conditional blastocyst complementation of a defective Foxa2 lineage efficiently promotes the generation of the whole lung
Source: eLife journal article supplement (doi:10.7554/elife.86105), 2023-10-20
Supplement: supp [file elife_poa_e86105_Supplementary_file_1.xlsx]

## Sheet: Supplementary File1a
Supplemental Table 1	The antibody list used for the immunostainings and flowcytometry analyses in this article
	Name	Company	Catalog Number	Dilution
	CD31-APC	Biolegend	102510	1 : 20
	CD326-BV421	Biolegend	118225	1 : 50
	CD326-BV711	Biolegend	118233	1 : 50
	CD45-BV605	Biolegend	103104	1 : 20
	Donley anti Chicken IgG (H+L), Alexa Fluor 488	Jackson Immunoresearch	703545155	1 : 400
	Donley anti Goat IgG (H+L), Alexa Fluor 568	Invitrogen	A11057	1 : 400
	Donley anti Goat IgG (H+L), Alexa Fluor 647	Invitrogen	A21447	1 : 400
	Donley anti Mouse IgG (H+L), Alexa Fluor 488	Invitrogen	A21202	1 : 400
	Donley anti Rabbit IgG (H+L), Alexa Fluor 488	Invitrogen	A21206	1 : 400
	Donley anti Rabbit IgG (H+L), Alexa Fluor 568	Invitrogen	A10042	1 : 400
	Donley anti Rabbit IgG (H+L), Alexa Fluor 647	Invitrogen	A31573	1 : 400
	Donley anti Rat IgG (H+L), Alexa Fluor 488	Invitrogen	A21208	1 : 400
	Donley anti Rat IgG (H+L), Alexa Fluor 647	Invitrogen	A78947	1 : 400
	E-cadherin	Invitrogen	131900	1 : 100
	EPCAM-BV785	Biolegend	324238	1 : 50
	Fgfr2	CST	23328S	1:100
	Foxa2	CST	8186S	1 : 200
	GFP	MBL International Corporation	598	1 : 200
	GFP	Aves Labs	GFP1020	1 : 200
	MIXL1	Novus Biologicals	NBP2-55175	1 : 200
	Nkx2-1	Seven Hills Bioreagents	WRAB-1231	1 : 500
	Pdgfrα	CST	3174S	1 : 100
	PDGFRα-Alexa647	Bioscience	562798	1 : 50
	Pdgfrβ	CST	3169S	1 : 100
	Pecam1	CST	77699	1 : 200
	Sma	Sigma-Aldrich	A2547	1 : 200
	SOX9	R&D Systems	AF3075	1 : 200
	SSEA1	CST	4744S	1 : 200
	SSEA1-PE	Biolegend	125606	1 : 20
	TBX4	Santa Cruz Biotechnology	sc-515196	1 : 50
	tdTomato	biorbyt	orb182397	1 : 200
	VE-cadherin	R&D Systems	AF1002SP	1 : 200
	Zombie AquaTM Fixable Viability Kit	Biolegend	423101	1 : 100

## Sheet: Supplementary File1b
Supplemental Table 2	The primer list used for qPCR analysis in the article
	Gene	Forward primers sequence	Reverse primer sequence
	hACTA2	CTATGAGGGCTATGCCTTGCC	GCTCAGCAGTAGTAACGAAGGA
	hBMP4	CAAACTTGCTGGAAAGGCTC	CCGCTACTGCAGGGACCTAT
	hCPM	TCCAAGGTGGAATGCAAGAT	TCAAAAACTTGACCCTTTACACC
	hFGF10	CCGTACAGCATCCTGGAGATAAC	TCCTCTCCTTCAGCTTACAGTCA
	hFOXA2	TCGCTCTCCTTCAACGACTGTTTCC	TTCTCGAACATGTTGCCCGAGTCAG
	hFOXF1	AGCAGCCGTATCTGCACCAGAA	CTCCTTTCGGTCACACATGCTG
	hGAPDH	GAAGGTGAAGGTCGGAGTCA	TTGATGGCAACAATATCCACTT
	hISL1	AGATTATATCAGGTTGTACGGGATCA	ACACAGCGGAAACACTCGAT
	hMIXL1	GGTACCCCGACATCCACTTG	TAATCTCCGGCCTAGCCAAA
	hNKX2-1	AGCACACGACTCCGTTCTC	GCCCACTTTCTTGTAGCTTTCC
	hOSR1	CAGCTCACCAACTACTCCTTCCTTCA	TGCAACGCGCTGAAACCATACA
	hPDGFRa	TTGAAGGCAGGCACATTTACA	GCGACAAGGTATAATGGCAGAAT
	hPDGFRb	ATCCCCAGTGCCGAGTTAGAAGAC	AGGACAGTGGGCGGTGGGTAGG
	hSOX17	CGCTTTCATGGTGTGGGCTAAGGACG	TAGTTGGGGTGGTCCTGCATGTGCTG
	hSOX2	AGTCTCCAAGCGACGAAAAA	TTTCACGTTTGCAACTGTCC
	hTBX4	CCATCGCTACAAGTTCTGTGAC	GAATCCGGGTGGACATACAG
	hWNT2	CTGTATCAGGGACCGAGAGG	CCCACAGCACATGACTTCAC

## Sheet: Supplementary File1c
Supplemental Table 3	Summary of PSC donor lines, culture conditions, host mouse strains, and data for chimera formation, lung complementation, and survival in mice subjected to CBC
	Cell Line	Passage number	Donor PSC background	PSC treatment	host mice	Number of host blastocysts	Host blastocyst background	Number of injected PSCs per blastocyst	% survival (number of pups or embryos/number of transferred blastocysts)	% survival at P0 (number of pups survived P0/number of pups born)	% chimera formation at analysis*	Analysis	% complementation (number of complementation/number of chimeric animals)**	Note
	nGFP+iPSC	13	C57BL/6N	a2i/VPA/LIF	Foxa2	16	129xB6xCD1	20	75% (12/16)	-	83% (10/12)	E17.5	50% (5/10)	Figure 4
	nGFP+iPSC	13	C57BL/6N	a2i/VPA/LIF	Shh	24	129xB6xCD1	20	38% 9/24)	-	100% (9/9)	E17.5	22% (2/9)	Figure 4
	nGFP+iPSC	14	C57BL/6N	a2i/VPA/LIF	Shh	30	129xB6xCD1	20	57% (17/30)	-	76% (13/17)	E17.5	23% (3/13)	Figure 4
	nGFP+iPSC	13	C57BL/6N	a2i/VPA/LIF	Foxa2	20	129xB6xCD1	20	50% (10/20)	-	40% (4/10)	E14.5	50% (2/4)	Figure S4
	nGFP+iPSC	13	C57BL/6N	a2i/VPA/LIF	Foxa2	22	129xB6xCD1	20	50% (11/22)	-	82% (9/11)	E14.5	11% (1/9)	Figure S4
	PSCCAG-GFP	15	F1 hybrid mouse (C57Bl/6x129)	a2i/VPA/LIF	Foxa2	28	129xB6xCD1	20	50% (14/28)	64% (9/14)	75% (6/8)a, b, c	4 weeks	40% (2/5)d	Figure 5 aOne dead in 2weeks because of inapropriate growth with unkown reason. bOne mice were entirely replaced by donor cells. cOne removed from analysis because of no chimera. dOne removed from analysis because of unknown genotype. Total four mice were removed from analysis.
	PSCCAG-GFP	15	F1 hybrid mouse (C57Bl/6x129)	a2i/VPA/LIF	Foxa2	50	129xB6xCD1	20	60% (30/50)	86% (25/30)	84% (21/23)e, f	4 weeks	16% (3/19)g	Figure 5 eTwo dead in 2weeks because of inapropriate growth with unknown reason. fTwo mice were entirely replaced by donor cells. gTwo removed from the analysis because of unknown genotype. Total 6 mice were removed from analysis.
	*Percentage chimera formation was based on the presence of different skin color derived from donor cells (GFP) of P0 neonates or embryos, as indicated. **Percentage complementation was determined as the number of chimeric animals with CBC-rescued lungs in homozygous Fgfr2cnull divided by the total number of chimeric animals in the litter.
