# Supplementary material for: Conditional blastocyst complementation of a defective Foxa2 lineage efficiently promotes the generation of the whole lung
Source: eLife. 2023 Oct 20;12:e86105. doi: 10.7554/eLife.86105 (PMC10642968; doi:10.7554/eLife.86105)
Supplement: Supplementary file 1. [file elife-86105-supp1.xlsx]

## Sheet: Supplementary File1
Supplementary file 1	The antibody list used for the immunostainings and flowcytometry analyses in this article
	Name	Company	Catalog Number	Dilution
	CD31-APC	Biolegend	102510	1 : 20
	CD326-BV421	Biolegend	118225	1 : 50
	CD326-BV711	Biolegend	118233	1 : 50
	CD45-BV605	Biolegend	103104	1 : 20
	Donley anti Chicken IgG (H+L), Alexa Fluor 488	Jackson Immunoresearch	703545155	1 : 400
	Donley anti Goat IgG (H+L), Alexa Fluor 568	Invitrogen	A11057	1 : 400
	Donley anti Goat IgG (H+L), Alexa Fluor 647	Invitrogen	A21447	1 : 400
	Donley anti Mouse IgG (H+L), Alexa Fluor 488	Invitrogen	A21202	1 : 400
	Donley anti Rabbit IgG (H+L), Alexa Fluor 488	Invitrogen	A21206	1 : 400
	Donley anti Rabbit IgG (H+L), Alexa Fluor 568	Invitrogen	A10042	1 : 400
	Donley anti Rabbit IgG (H+L), Alexa Fluor 647	Invitrogen	A31573	1 : 400
	Donley anti Rat IgG (H+L), Alexa Fluor 488	Invitrogen	A21208	1 : 400
	Donley anti Rat IgG (H+L), Alexa Fluor 647	Invitrogen	A78947	1 : 400
	E-cadherin	Invitrogen	131900	1 : 100
	EPCAM-BV785	Biolegend	324238	1 : 50
	Fgfr2	CST	23328S	1:100
	Foxa2	CST	8186S	1 : 200
	GFP	MBL International Corporation	598	1 : 200
	GFP	Aves Labs	GFP1020	1 : 200
	MIXL1	Novus Biologicals	NBP2-55175	1 : 200
	Nkx2-1	Seven Hills Bioreagents	WRAB-1231	1 : 500
	Pdgfrα	CST	3174S	1 : 100
	PDGFRα-Alexa647	Bioscience	562798	1 : 50
	Pdgfrβ	CST	3169S	1 : 100
	Pecam1	CST	77699	1 : 200
	Sma	Sigma-Aldrich	A2547	1 : 200
	SOX9	R&D Systems	AF3075	1 : 200
	SSEA1	CST	4744S	1 : 200
	SSEA1-PE	Biolegend	125606	1 : 20
	TBX4	Santa Cruz Biotechnology	sc-515196	1 : 50
	tdTomato	biorbyt	orb182397	1 : 200
	VE-cadherin	R&D Systems	AF1002SP	1 : 200
	Zombie AquaTM Fixable Viability Kit	Biolegend	423101	1 : 100
