# Supplementary material for: Conditional blastocyst complementation of a defective Foxa2 lineage efficiently promotes the generation of the whole lung
Source: eLife. 2023 Oct 20;12:e86105. doi: 10.7554/eLife.86105 (PMC10642968; doi:10.7554/eLife.86105)
Supplement: Supplementary file 2. [file elife-86105-supp2.xlsx]

## Sheet: Supplementary File2
Supplementar file 2	The primer list used for qPCR analysis in the article
	Gene	Forward primers sequence	Reverse primer sequence
	hACTA2	CTATGAGGGCTATGCCTTGCC	GCTCAGCAGTAGTAACGAAGGA
	hBMP4	CAAACTTGCTGGAAAGGCTC	CCGCTACTGCAGGGACCTAT
	hCPM	TCCAAGGTGGAATGCAAGAT	TCAAAAACTTGACCCTTTACACC
	hFGF10	CCGTACAGCATCCTGGAGATAAC	TCCTCTCCTTCAGCTTACAGTCA
	hFOXA2	TCGCTCTCCTTCAACGACTGTTTCC	TTCTCGAACATGTTGCCCGAGTCAG
	hFOXF1	AGCAGCCGTATCTGCACCAGAA	CTCCTTTCGGTCACACATGCTG
	hGAPDH	GAAGGTGAAGGTCGGAGTCA	TTGATGGCAACAATATCCACTT
	hISL1	AGATTATATCAGGTTGTACGGGATCA	ACACAGCGGAAACACTCGAT
	hMIXL1	GGTACCCCGACATCCACTTG	TAATCTCCGGCCTAGCCAAA
	hNKX2-1	AGCACACGACTCCGTTCTC	GCCCACTTTCTTGTAGCTTTCC
	hOSR1	CAGCTCACCAACTACTCCTTCCTTCA	TGCAACGCGCTGAAACCATACA
	hPDGFRa	TTGAAGGCAGGCACATTTACA	GCGACAAGGTATAATGGCAGAAT
	hPDGFRb	ATCCCCAGTGCCGAGTTAGAAGAC	AGGACAGTGGGCGGTGGGTAGG
	hSOX17	CGCTTTCATGGTGTGGGCTAAGGACG	TAGTTGGGGTGGTCCTGCATGTGCTG
	hSOX2	AGTCTCCAAGCGACGAAAAA	TTTCACGTTTGCAACTGTCC
	hTBX4	CCATCGCTACAAGTTCTGTGAC	GAATCCGGGTGGACATACAG
	hWNT2	CTGTATCAGGGACCGAGAGG	CCCACAGCACATGACTTCAC
