# Supplementary material for: Conditional blastocyst complementation of a defective Foxa2 lineage efficiently promotes the generation of the whole lung
Source: eLife. 2023 Oct 20;12:e86105. doi: 10.7554/eLife.86105 (PMC10642968; doi:10.7554/eLife.86105)
Supplement: Supplementary file 3. [file elife-86105-supp3.xlsx]

## Sheet: Supplementary File3
Supplementary file 3	Summary of PSC donor lines, culture conditions, host mouse strains, and data for chimera formation, lung complementation, and survival in mice subjected to CBC
	Cell Line	Passage number	Donor PSC background	PSC treatment	host mice	Number of host blastocysts	Host blastocyst background	Number of injected PSCs per blastocyst	% survival (number of pups or embryos/number of transferred blastocysts)	% survival at P0 (number of pups survived P0/number of pups born)	% chimera formation at analysis*	Analysis	% complementation (number of complementation/number of chimeric animals)**	Note
	nGFP+iPSC	13	C57BL/6N	a2i/VPA/LIF	Foxa2	16	129xB6xCD1	20	75% (12/16)	-	83% (10/12)	E17.5	50% (5/10)	Figure 4
	nGFP+iPSC	13	C57BL/6N	a2i/VPA/LIF	Shh	24	129xB6xCD1	20	38% 9/24)	-	100% (9/9)	E17.5	22% (2/9)	Figure 4
	nGFP+iPSC	14	C57BL/6N	a2i/VPA/LIF	Shh	30	129xB6xCD1	20	57% (17/30)	-	76% (13/17)	E17.5	23% (3/13)	Figure 4
	nGFP+iPSC	13	C57BL/6N	a2i/VPA/LIF	Foxa2	20	129xB6xCD1	20	50% (10/20)	-	40% (4/10)	E14.5	50% (2/4)	Figure S4
	nGFP+iPSC	13	C57BL/6N	a2i/VPA/LIF	Foxa2	22	129xB6xCD1	20	50% (11/22)	-	82% (9/11)	E14.5	11% (1/9)	Figure S4
	PSCCAG-GFP	15	F1 hybrid mouse (C57Bl/6x129)	a2i/VPA/LIF	Foxa2	28	129xB6xCD1	20	50% (14/28)	64% (9/14)	75% (6/8)a, b, c	4 weeks	40% (2/5)d	Figure 5 aOne dead in 2weeks because of inapropriate growth with unkown reason. bOne mice were entirely replaced by donor cells. cOne removed from analysis because of no chimera. dOne removed from analysis because of unknown genotype. Total four mice were removed from analysis.
	PSCCAG-GFP	15	F1 hybrid mouse (C57Bl/6x129)	a2i/VPA/LIF	Foxa2	50	129xB6xCD1	20	60% (30/50)	86% (25/30)	84% (21/23)e, f	4 weeks	16% (3/19)g	Figure 5 eTwo dead in 2weeks because of inapropriate growth with unknown reason. fTwo mice were entirely replaced by donor cells. gTwo removed from the analysis because of unknown genotype. Total 6 mice were removed from analysis.
	*Percentage chimera formation was based on the presence of different skin color derived from donor cells (GFP) of P0 neonates or embryos, as indicated. **Percentage complementation was determined as the number of chimeric animals with CBC-rescued lungs in homozygous Fgfr2cnull divided by the total number of chimeric animals in the litter.
