# Supplementary figures and images for: Conditional blastocyst complementation of a defective Foxa2 lineage efficiently promotes the generation of the whole lung
Source: eLife journal article supplement (doi:10.7554/elife.86105), 2023-10-20

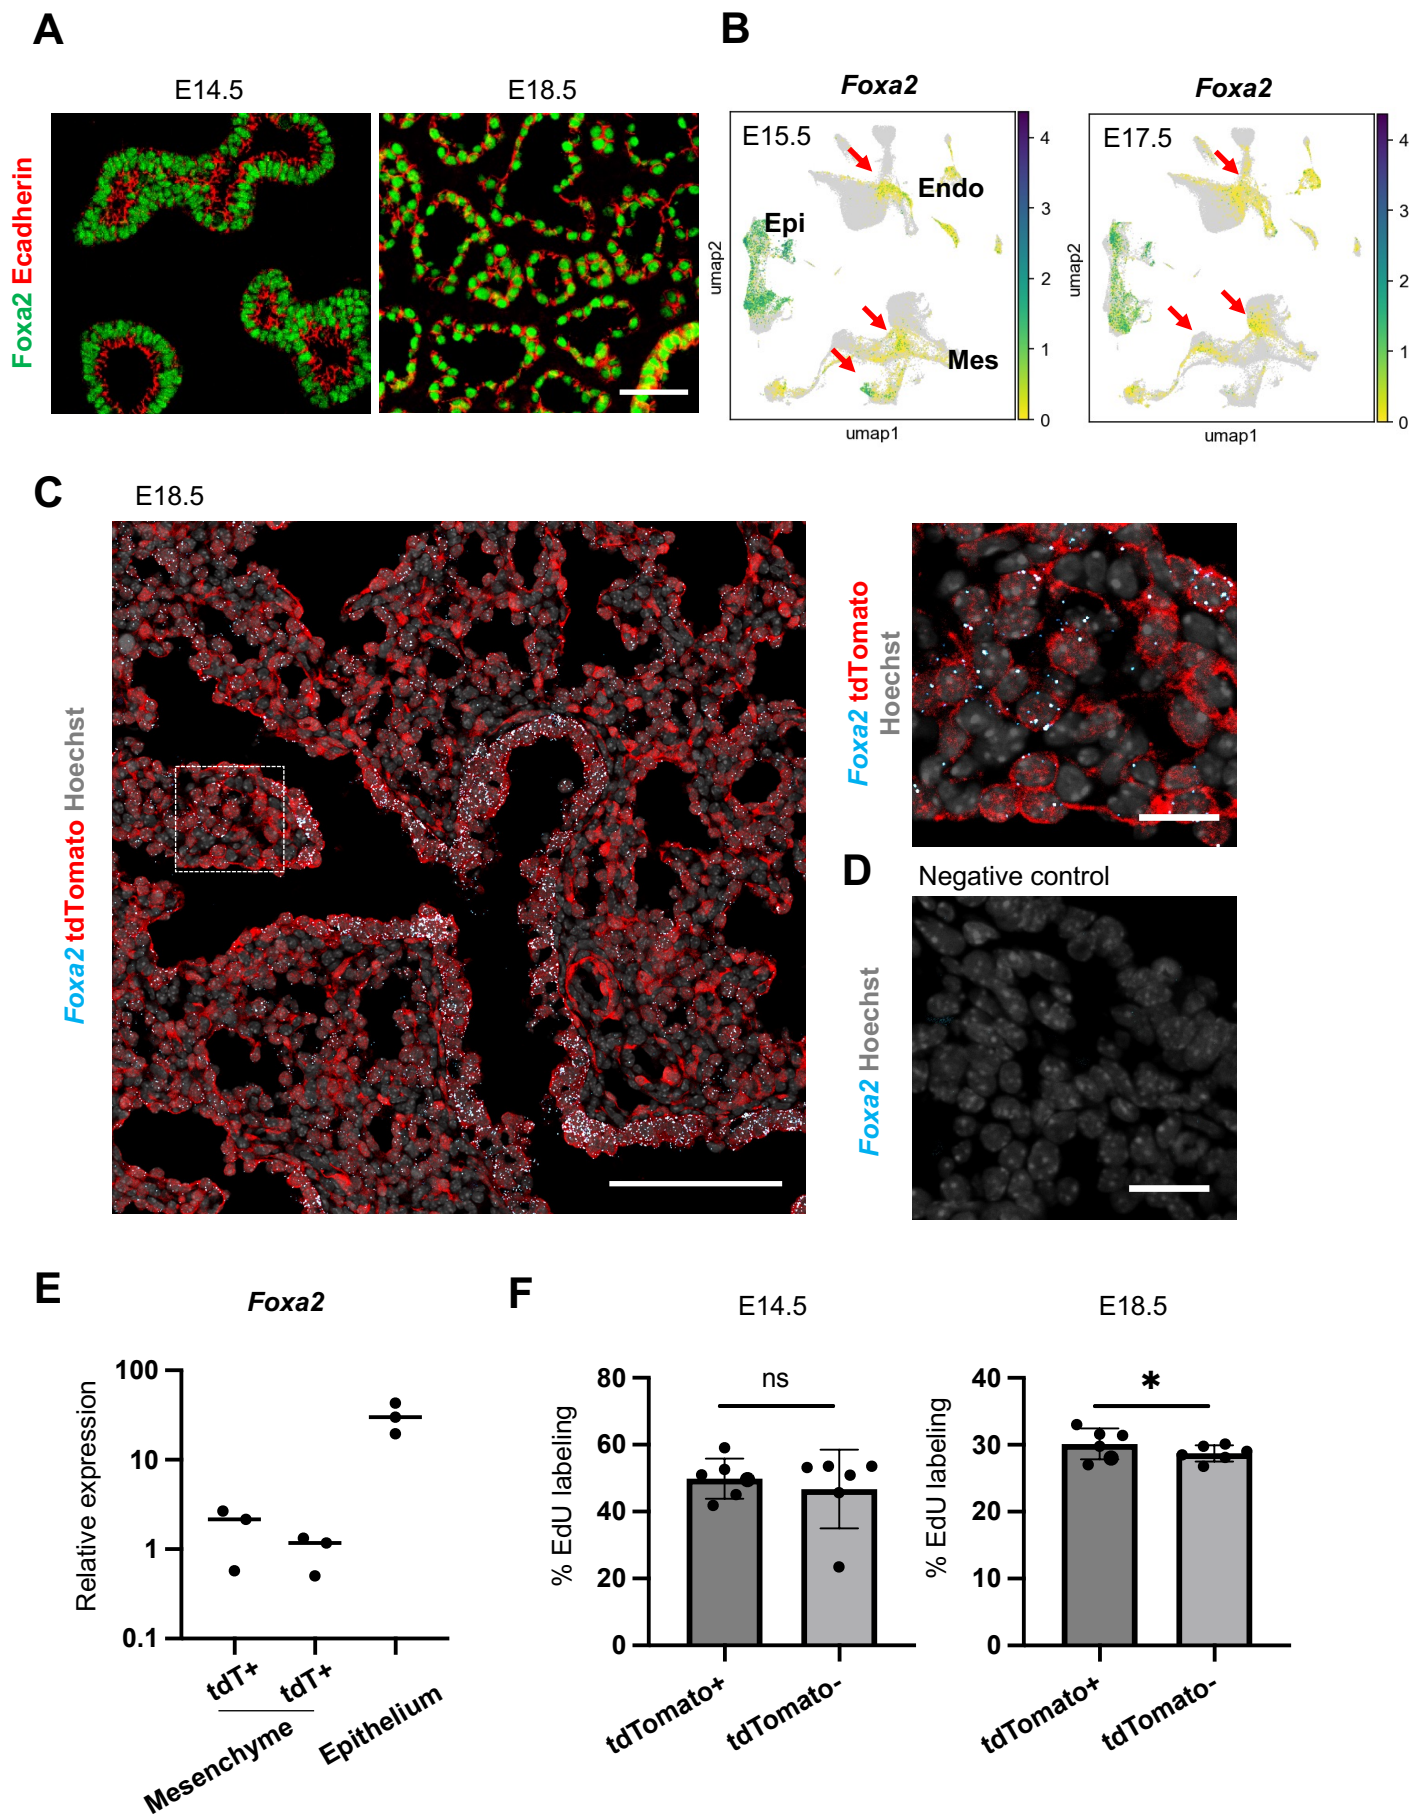

Supplement: supp [file elife-86105-supp-v1.zip]

**A**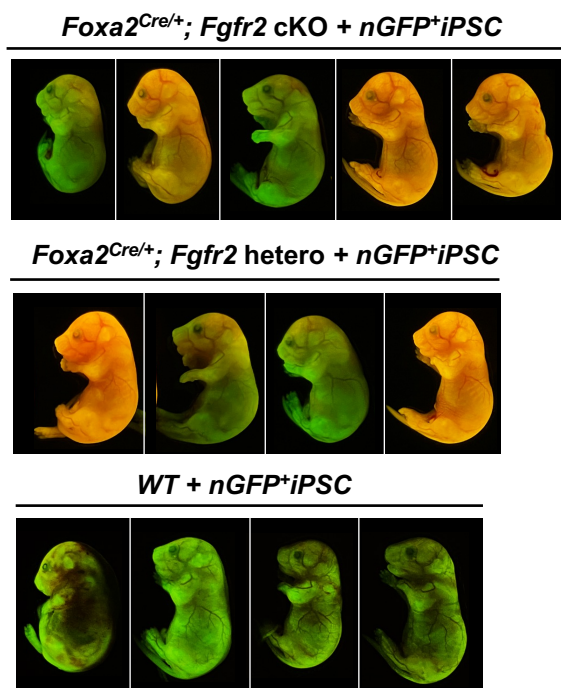**B**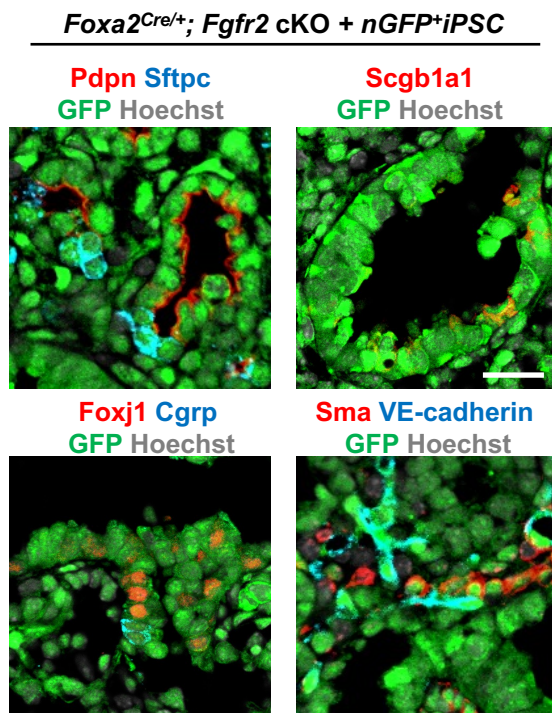**C**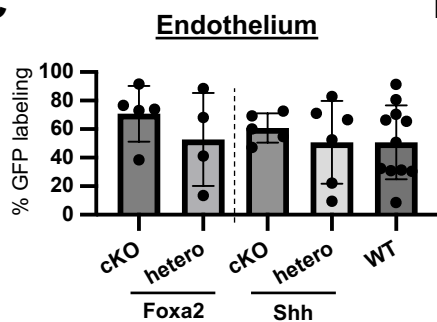**D**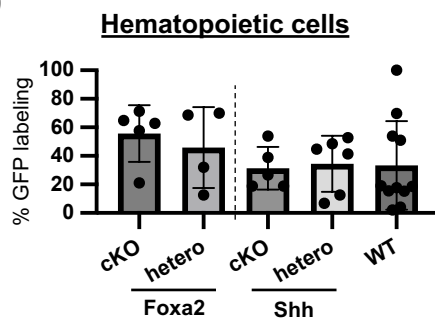**F**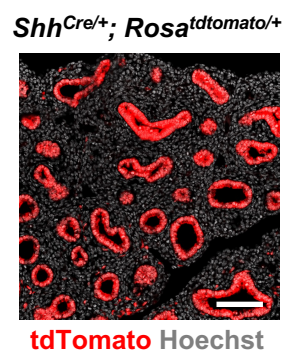**E**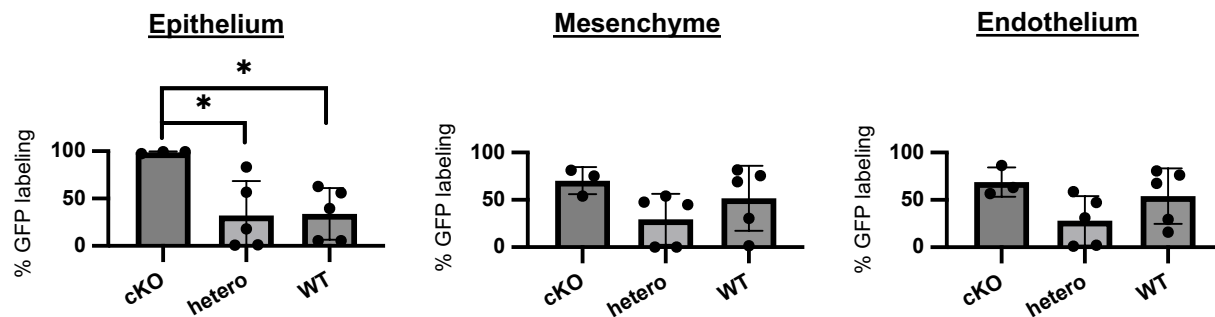

Supplement: supp [file elife-86105-supp-v1.zip]

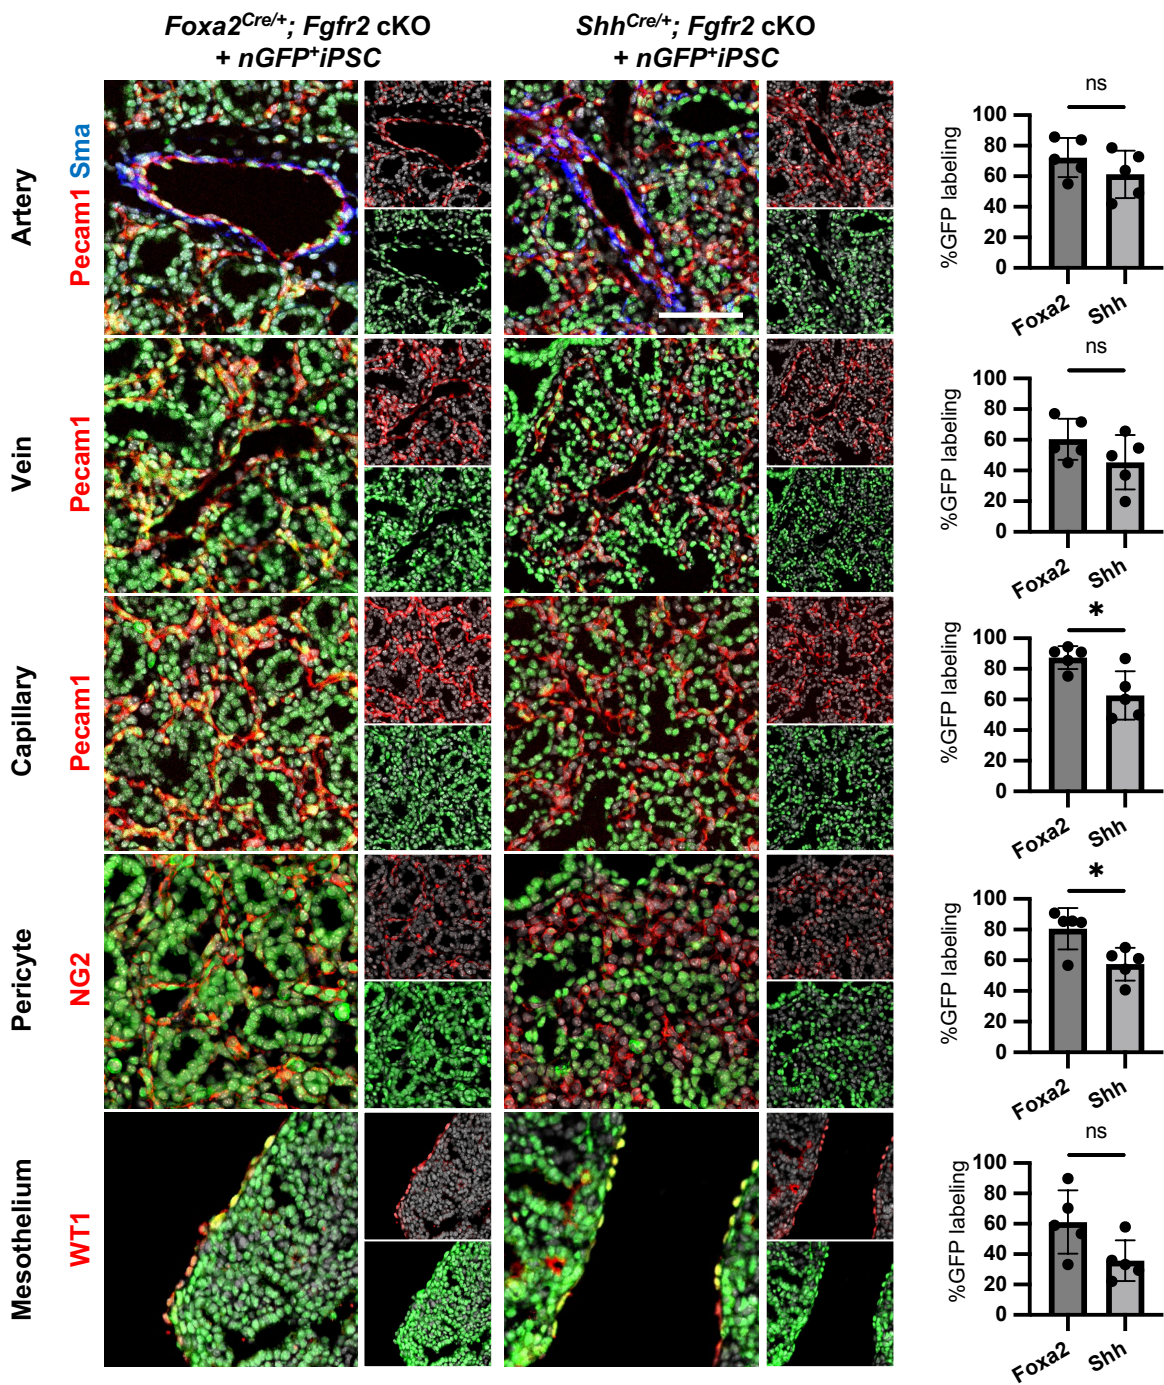

Supplement: supp [file elife-86105-supp-v1.zip]

**A**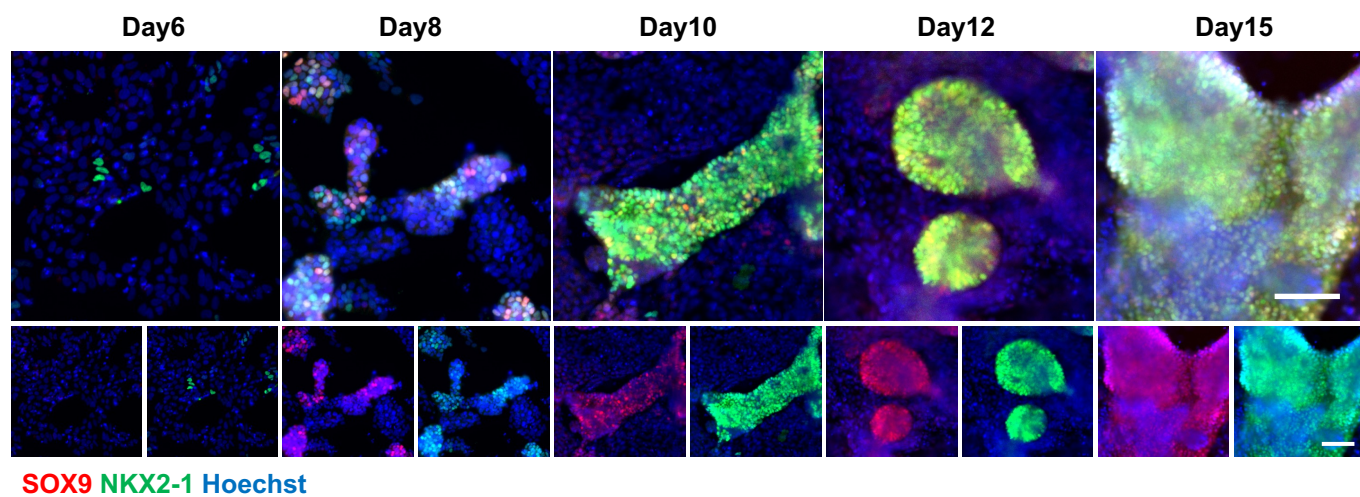**B**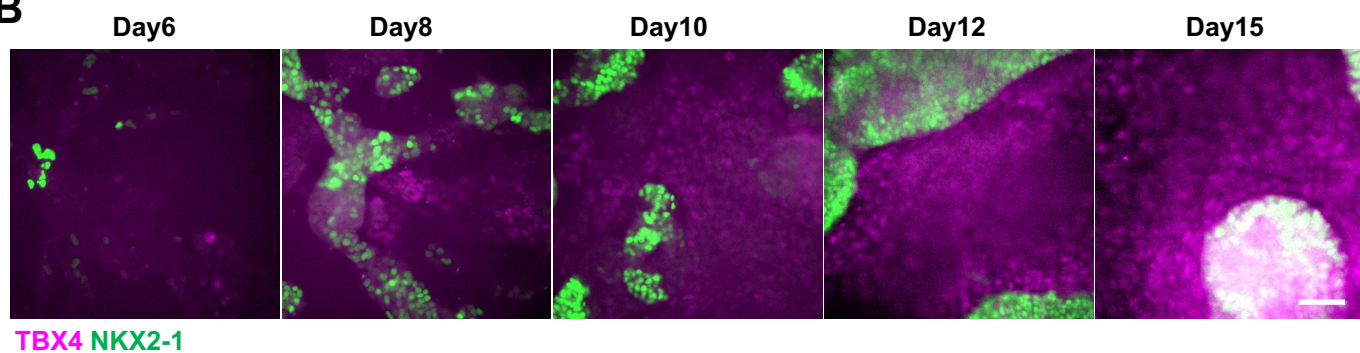**C**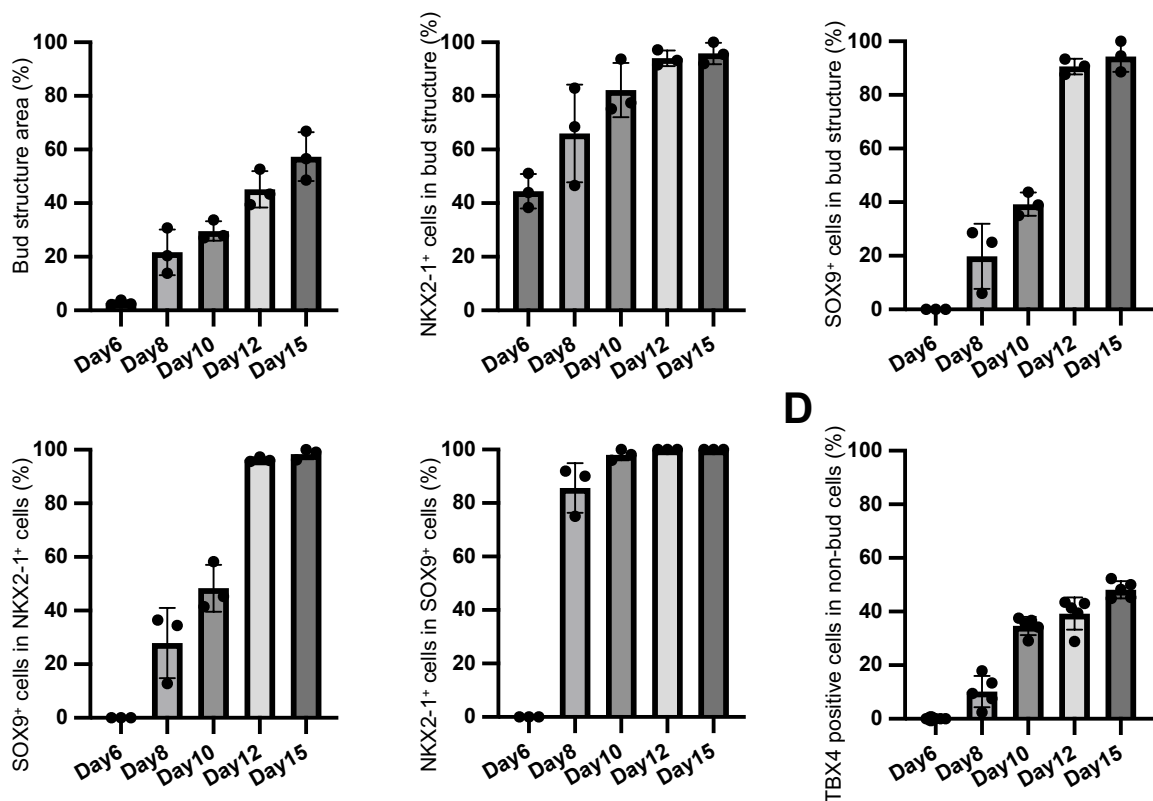**D**

Supplement: supp [file elife-86105-supp-v1.zip]

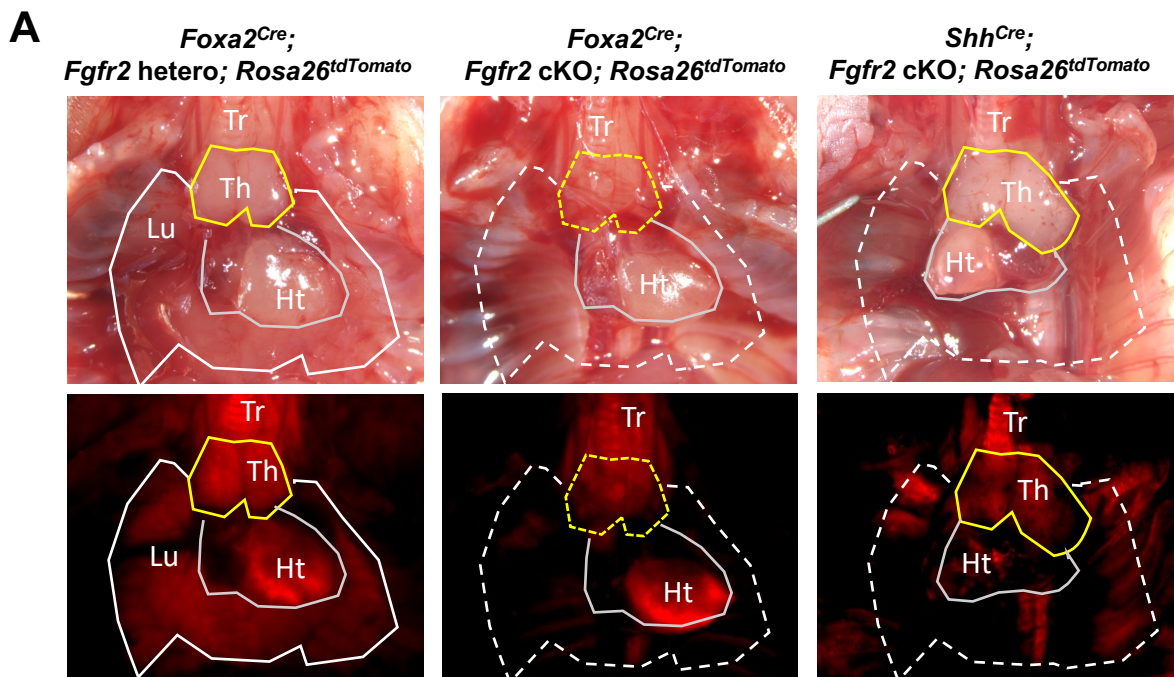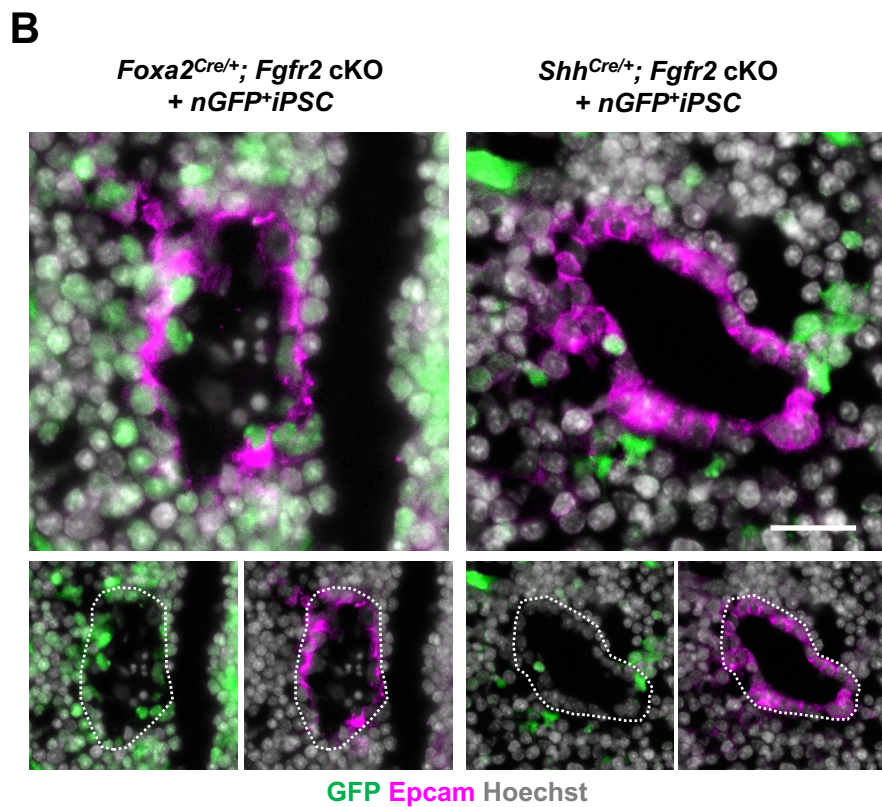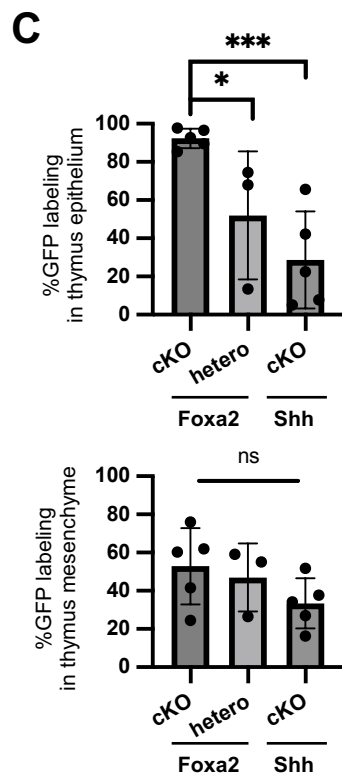

Supplement: supp [file elife-86105-supp-v1.zip]
